# Supplementary material for: Long-term safety of tofacitinib for the treatment of rheumatoid arthritis up to 8.5 years: integrated analysis of data from the global clinical trials
Source: PubMed Central journal article supplement — Ann Rheum Dis. 2017 Jun 9;76(7):1253–62. doi: 10.1136/annrheumdis-2016-210457 (PMC5530353; doi:10.1136/annrheumdis-2016-210457), 2017-06-09
Supplement: annrheumdis-2016-210457supp001.pdf [file annrheumdis-2016-210457supp001.pdf]

**Long-term Safety of Tofacitinib for the Treatment of Rheumatoid Arthritis up to 8.5 years:  
Integrated Analysis of Data from the Global Clinical Trials**

**SUPPLEMENTARY TEXT**

**Case ascertainment for gastrointestinal perforation**

Clinical events reflecting an opening in the gastrointestinal (GI) tract, including those associated with appendicitis and diverticulitis, were classified as confirmed GI perforations.

In addition, all serious adverse events coding to the following Medical Dictionary for Regulatory Activities preferred terms were submitted for independent review: peridiverticular abscess, abscess bacterial, abscess rupture, liver abscess, rectovaginal septum abscess, peritoneal abscess, splenic abscess, appendiceal abscess, pelvic abscess, biliary abscess, gallbladder abscess, mesenteric abscess, colitis, subdiaphragmatic abscess, pancreatic abscess, pyloric abscess, appendectomy, appendicitis, abdominal abscess, diverticulitis, diverticulum, peritonitis and postoperative abscess.

**Major adverse cardiovascular events**

In Phase 3 and LTE studies, cardiovascular events were blindly adjudicated by a sponsor-independent committee from February 25, 2009. Major adverse cardiovascular events (MACE) were defined as cardiovascular, non-fatal myocardial infarction (MI) or non-fatal stroke.

The most common cardiac disorders categorised as SAEs were atrial fibrillation (n=24), MI (n=21) and coronary artery disease (n=15). Total tofacitinib exposure for adjudicated composite MACE was 18,400 patient-years. Adjudicated MACE were reported in 71 patients, with an IR

(95% CI) of 0.4 (0.3–0.5). IRs were 0.4 (0.3–0.6) and 0.4 (0.3–0.5) for average 5 and 10 mg BID; and 0.4 (0.3–0.7) and 0.4 (0.2–0.5) for constant 5 and 10 mg BID. Analysis of IR by 1-year intervals did not reveal any trends for increases over time; IRs were small with wide and overlapping CIs (Supplementary Figure 2).

MACE IRs with tofacitinib were similar to those with placebo in Phase 3 trials, and earlier analyses of LTE studies did not reveal increased risk versus short-term controlled trials.[1] Here, the MACE IR was 0.4, with no increase over time. Long-term comparative studies are required to assess whether tofacitinib increases MACE risk versus bDMARDs; a Phase 4 trial is underway to investigate this (NCT02092467). Phase 3 trials revealed increased total cholesterol, high-density lipoprotein cholesterol (HDL-C) and low-density lipoprotein cholesterol (LDL-C) levels in patients receiving tofacitinib, although the LDL-C/HDL-C ratio remained largely unchanged.[1] Further research revealed that tofacitinib improved the anti-atherogenic protein profile of HDL-C and decreased cholesterol ester catabolism, which was elevated in patients with RA versus matched healthy controls.[2]

## REFERENCES

- 1 Charles-Schoeman C, Wicker P, Gonzalez-Gay MD, *et al.* Cardiovascular safety findings in patients with rheumatoid arthritis treated with tofacitinib, an oral Janus kinase inhibitor. *Semin Arthritis Rheum* 2016;**In press**.
- 2 Charles-Schoeman C, Fleischmann R, Davignon J, *et al.* Potential mechanisms leading to the abnormal lipid profile in patients with rheumatoid arthritis versus healthy volunteers and reversal by tofacitinib. *Arthritis Rheumatol* 2015;**67**:616–25.
- 3 Kremer JM, Kivitz AJ, Simon-Campos JA, *et al.* Evaluation of the effect of tofacitinib on measured glomerular filtration rate in patients with active rheumatoid arthritis: results from a randomised controlled trial. *Arthritis Res Ther* 2015;**17**:95.
- 4 Kremer JM, Bloom BJ, Breedveld FC, *et al.* The safety and efficacy of a JAK inhibitor in patients with active rheumatoid arthritis: Results of a double-blind, placebo-controlled phase IIa trial of three dosage levels of CP-690,550 versus placebo. *Arthritis Rheum* 2009;**60**:1895–905.
- 5 Kremer JM, Cohen S, Wilkinson BE, *et al.* A phase IIb dose-ranging study of the oral JAK inhibitor tofacitinib (CP-690,550) versus placebo in combination with background methotrexate in patients with active rheumatoid arthritis and an inadequate response to methotrexate alone. *Arthritis Rheum* 2012;**64**:970–81.
- 6 Fleischmann R, Cutolo M, Genovese MC, *et al.* Phase IIb dose-ranging study of the oral JAK inhibitor tofacitinib (CP-690,550) or adalimumab monotherapy versus placebo in patients with

active rheumatoid arthritis with an inadequate response to disease-modifying antirheumatic drugs. *Arthritis Rheum* 2012;64:617–29.

- 7 Tanaka Y, Suzuki M, Nakamura H, et al. Phase II study of tofacitinib (CP-690,550) combined with methotrexate in patients with rheumatoid arthritis and an inadequate response to methotrexate. *Arthritis Care Res (Hoboken)* 2011;63:1150–58.
- 8 Tanaka Y, Takeuchi T, Yamanaka H, et al. Efficacy and safety of tofacitinib as monotherapy in Japanese patients with active rheumatoid arthritis: a 12-week, randomized, phase 2 study. *Mod Rheumatol* 2015;25:514–21.
- 9 Conaghan PG, Østergaard M, Bowes MA, et al. Comparing the effects of tofacitinib, methotrexate and the combination, on bone marrow oedema, synovitis and bone erosion in methotrexate-naive, early active rheumatoid arthritis: results of an exploratory randomised MRI study incorporating semiquantitative and quantitative techniques. *Ann Rheum Dis* 2016;75:1024–33.
- 10 Boyle DL, Soma K, Hodge J, et al. The JAK inhibitor tofacitinib suppresses synovial JAK1-STAT signalling in rheumatoid arthritis. *Ann Rheum Dis* 2015;74:1311–16.
- 11 McInnes IB, Kim HY, Lee SH, et al. Open-label tofacitinib and double-blind atorvastatin in rheumatoid arthritis patients: a randomised study. *Ann Rheum Dis* 2014;73:124–31.
- 12 Winthrop KL, Silverfield J, Racewicz A, et al. The effect of tofacitinib on pneumococcal and influenza vaccine responses in rheumatoid arthritis. *Ann Rheum Dis* 2016;75:687–95.

- 13 Burmester GR, Blanco R, Charles-Schoeman C, et al. Tofacitinib (CP-690,550) in combination with methotrexate in patients with active rheumatoid arthritis with an inadequate response to tumour necrosis factor inhibitors: a randomised phase 3 trial. *Lancet* 2013;381:451–60.
- 14 van der Heijde D, Tanaka Y, Fleischmann R, et al. Tofacitinib (CP-690,550) in patients with rheumatoid arthritis receiving methotrexate: twelve-month data from a twenty-four-month phase III randomized radiographic study. *Arthritis Rheum* 2013;65:559–70.
- 15 Fleischmann R, Kremer J, Cush J, et al. Placebo-controlled trial of tofacitinib monotherapy in rheumatoid arthritis. *N Engl J Med* 2012;367:495–507.
- 16 Kremer J, Li ZG, Hall S, et al. Tofacitinib in combination with nonbiologic disease-modifying antirheumatic drugs in patients with active rheumatoid arthritis: a randomized trial. *Ann Intern Med* 2013;159:253–61.
- 17 van Vollenhoven RF, Fleischmann R, Cohen S, et al. Tofacitinib or adalimumab versus placebo in rheumatoid arthritis. *N Engl J Med* 2012;367:508–19.
- 18 Lee EB, Fleischmann R, Hall S, et al. Tofacitinib versus methotrexate in rheumatoid arthritis. *N Engl J Med* 2014;370:2377–86.
- 19 Wollenhaupt J, Silverfield J, Lee EB, et al. Safety and efficacy of tofacitinib, an oral Janus kinase Inhibitor, for the treatment of rheumatoid arthritis in open-label, longterm extension studies. *J Rheumatol* 2014;41:837–52.

20 World Health Organization. Global tuberculosis control: WHO report 2011. Available at:  
[http://whqlibdoc.who.int/publications/2011/9789241564380\\_eng.pdf](http://whqlibdoc.who.int/publications/2011/9789241564380_eng.pdf). Accessed October 17, 2014.

**Supplementary Table 1** Phase 1, Phase 2, Phase 3 and LTE studies included in the present analysis

| Clinicaltrials.gov identifier | Sponsor ID | Patients receiving tofacitinib, n      | Patient population                                         | Tofacitinib doses                                      | Control group | Study duration                            |
|-------------------------------|------------|----------------------------------------|------------------------------------------------------------|--------------------------------------------------------|---------------|-------------------------------------------|
| <b>Phase 1</b>                |            |                                        |                                                            |                                                        |               |                                           |
| NCT01262118[2]                | A3921130   | 36 (RA),<br>33 (healthy<br>volunteers) | Active RA and healthy<br>volunteers                        | 10 mg BID<br><br>(background MTX<br>permitted)         | None          | 6 weeks                                   |
| NCT01484561[3]                | A3921152   | 97                                     | Active RA with<br>inadequate response to<br>$\geq 1$ DMARD | 10 mg BID<br><br>(background<br>csDMARDs<br>permitted) | Placebo BID   | 6 weeks (for<br>tofacitinib<br>treatment) |

| Clinicaltrials.gov<br>identifier | Sponsor ID | Patients<br>receiving<br>tofacitinib,<br>n | Patient population                                                                                             | Tofacitinib doses                                                  | Control group | Study<br>duration |
|----------------------------------|------------|--------------------------------------------|----------------------------------------------------------------------------------------------------------------|--------------------------------------------------------------------|---------------|-------------------|
| <b>Phase 2</b>                   |            |                                            |                                                                                                                |                                                                    |               |                   |
| NCT00147498[4]                   | A3921019   | 199                                        | Active RA with<br>inadequate or<br>unacceptable toxicity to<br>MTX, etanercept,<br>infliximab or<br>adalimumab | 5 mg BID, 15 mg<br>BID, 30 mg BID<br>monotherapy                   | Placebo BID   | 6 weeks           |
| NCT00413660[5]                   | A3921025   | 438                                        | Active RA with<br>inadequate response to<br>MTX                                                                | 1, 3, 5, 10, or 15<br>mg BID or 20 mg<br>QD with<br>background MTX | Placebo       | 24 weeks          |



| Clinicaltrials.gov<br>identifier | Sponsor ID | Patients<br>receiving<br>tofacitinib,<br>n | Patient population                                         | Tofacitinib doses                            | Control group                          | Study<br>duration |
|----------------------------------|------------|--------------------------------------------|------------------------------------------------------------|----------------------------------------------|----------------------------------------|-------------------|
| NCT00550446[6]                   | A3921035   | 272                                        | Active RA with<br>inadequate response to<br>$\geq 1$ DMARD | 1, 3, 5, 10, or 15<br>mg BID<br>monotherapy  | Adalimumab sc<br>40 mg Q2W;<br>placebo | 24 weeks          |
| NCT00603512[7]                   | A3921039   | 108                                        | Active RA with<br>inadequate response to<br>MTX            | 1, 3, 5, 10 mg BID<br>plus background<br>MTX | Placebo                                | 12 weeks          |
| NCT00687193[8]                   | A3921040   | 265                                        | Active RA with<br>inadequate response to<br>$\geq 1$ DMARD | 1, 3, 5, 10, or 15<br>mg BID<br>monotherapy  | Placebo                                | 12 weeks          |

| Clinicaltrials.gov<br>identifier | Sponsor ID | Patients<br>receiving<br>tofacitinib,<br>n | Patient population                              | Tofacitinib doses                               | Control group | Study<br>duration |
|----------------------------------|------------|--------------------------------------------|-------------------------------------------------|-------------------------------------------------|---------------|-------------------|
| NCT01164579[9]                   | A3921068   | 72                                         | Early active RA, MTX-<br>naïve                  | 10 mg BID plus<br>MTX, 10 mg BID<br>monotherapy | MTX           | 52 weeks          |
| NCT00976599[10]                  | A3921073   | 15                                         | Active RA with<br>inadequate response to<br>MTX | 10 mg BID plus<br>background MTX                | Placebo       | 4 weeks           |

| Clinicaltrials.gov<br>identifier | Sponsor ID | Patients<br>receiving<br>tofacitinib,<br>n | Patient population | Tofacitinib doses                                                                                     | Control group | Study<br>duration |
|----------------------------------|------------|--------------------------------------------|--------------------|-------------------------------------------------------------------------------------------------------|---------------|-------------------|
| NCT01059864[11]                  | A3291109   | 111                                        | Active RA          | 10 mg BID, half of<br>patients received<br>concomitant<br>atorvastatin 10 mg<br>QD for Weeks 6–<br>12 | None          | 12 weeks          |
| NCT01359150<br>[12]              | A3921129   | 102                                        | Active RA          | 10 mg BID,<br>monotherapy (half<br>of patients) or with<br>background MTX                             | Placebo       | 9 weeks           |

### Phase 3

| Clinicaltrials.gov<br>identifier | Sponsor ID                | Patients<br>receiving<br>tofacitinib,<br>n | Patient population                                           | Tofacitinib doses                        | Control group                                                                                              | Study<br>duration |
|----------------------------------|---------------------------|--------------------------------------------|--------------------------------------------------------------|------------------------------------------|------------------------------------------------------------------------------------------------------------|-------------------|
| NCT00960440[13]                  | ORAL<br>Step,<br>A3921032 | 267                                        | Moderate to severe RA<br>with inadequate<br>response to TNFi | 5 or 10 mg BID<br>with background<br>MTX | Placebo                                                                                                    | 6 months          |
| NCT00847613[14]                  | ORAL<br>Scan,<br>A3921044 | 797                                        | Active RA with<br>inadequate response to<br>MTX              | 5 or 10 mg BID<br>with background<br>MTX | Placebo<br>(advanced to<br>tofacitinib at<br>Month 3 [non-<br>responders] or<br>6 [remaining<br>patients]) | 24 months         |

| Clinicaltrials.gov<br>identifier | Sponsor ID                | Patients<br>receiving<br>tofacitinib,<br>n | Patient population                                   | Tofacitinib doses                        | Control group                                                                                              | Study<br>duration |
|----------------------------------|---------------------------|--------------------------------------------|------------------------------------------------------|------------------------------------------|------------------------------------------------------------------------------------------------------------|-------------------|
| NCT00814307[15]                  | ORAL<br>Solo,<br>A3921045 | 610                                        | Active RA with<br>inadequate response to<br>≥1 DMARD | 5 or 10 mg BID<br>monotherapy            | Placebo<br>(advanced to<br>tofacitinib at<br>Month 3)                                                      | 6 months          |
| NCT00856544[16]                  | ORAL<br>Sync,<br>A3921046 | 792                                        | Active RA with<br>inadequate response to<br>≥1 DMARD | 5 or 10 mg BID<br>with background<br>MTX | Placebo<br>(advanced to<br>tofacitinib at<br>Month 3 [non-<br>responders] or<br>6 [remaining<br>patients]) | 12 months         |

| Clinicaltrials.gov identifier | Sponsor ID                    | Patients receiving tofacitinib, n | Patient population                              | Tofacitinib doses                        | Control group                                                                                                                                                                      | Study duration |
|-------------------------------|-------------------------------|-----------------------------------|-------------------------------------------------|------------------------------------------|------------------------------------------------------------------------------------------------------------------------------------------------------------------------------------|----------------|
| NCT00853385[17]               | ORAL<br>Standard,<br>A3921064 | 513                               | Active RA with<br>incomplete response to<br>MTX | 5 or 10 mg BID<br>with background<br>MTX | Adalimumab<br>40 mg sc Q2W;<br>placebo<br>(patients<br>receiving<br>placebo were<br>advanced to<br>tofacitinib at<br>Month 3 [non-<br>responders] or<br>6 [remaining<br>patients]) | 12 months      |

| Clinicaltrials.gov<br>identifier | Sponsor ID                 | Patients<br>receiving<br>tofacitinib,<br>n | Patient population   | Tofacitinib doses             | Control group | Study<br>duration |
|----------------------------------|----------------------------|--------------------------------------------|----------------------|-------------------------------|---------------|-------------------|
| NCT01039688[18]                  | ORAL<br>Start,<br>A3921069 | 770                                        | Active RA, MTX-naïve | 5 or 10 mg BID<br>monotherapy | MTX           | 24 months         |

| Clinicaltrials.gov<br>identifier | Sponsor ID                  | Patients<br>receiving<br>tofacitinib,<br>n | Patient population                                                                                      | Tofacitinib doses                                     | Control group | Study<br>duration |
|----------------------------------|-----------------------------|--------------------------------------------|---------------------------------------------------------------------------------------------------------|-------------------------------------------------------|---------------|-------------------|
| <b>LTE</b>                       |                             |                                            |                                                                                                         |                                                       |               |                   |
| NCT00413699[19]                  | ORAL<br>Sequel,<br>A3921024 | 2,308 (as<br>of March<br>31, 2015)         | Active RA who<br>participated in the above<br>studies                                                   | 5 or 10 mg BID,<br>concomitant<br>DMARDs<br>permitted | None          | Ongoing           |
| NCT00661661[19]                  | A3921041                    | 486                                        | Japanese patients with<br>active RA who<br>participated in studies<br>A3921039, A3921040<br>or A3921044 | 5 or 10 mg BID,<br>concomitant<br>DMARDs<br>permitted | None          | 72 months         |



BID, twice daily; csDMARD, conventional synthetic disease-modifying antirheumatic drug; LTE, long-term extension; MTX, methotrexate; Q2W, every 2 weeks; QD, once daily; RA, rheumatoid arthritis; sc, subcutaneous; TNFi, tumour necrosis factor inhibitor.

**Supplementary Table 2** Geographical distribution of non-serious and serious HZ cases, for all tofacitinib doses

| Geographical region           | Patients, n/N (%) | IR (95% CI)   |
|-------------------------------|-------------------|---------------|
| US/Canada                     | 163/1,505 (10.8)  | 4.3 (3.6–5.0) |
| Europe                        | 166/2,065 (8.0)   | 2.5 (2.1–2.9) |
| Latin America                 | 111/1,037 (10.7)  | 3.7 (3.0–4.4) |
| Asia                          | 263/1,587 (16.6)  | 5.9 (5.2–6.6) |
| Japan/Korea                   | 182/847 (21.5)    | 8.1 (7.0–9.4) |
| India                         | 16/197 (8.1)      | 3.4 (1.9–5.5) |
| Thailand/Malaysia/Philippines | 22/171 (12.9)     | 4.2 (2.6–6.4) |
| China/Taiwan                  | 23/249 (9.2)      | 2.7 (1.7–4.0) |
| Australia/New Zealand         | 20/123 (16.3)     | 5.3 (3.2–8.1) |

CI, confidence interval; HZ, herpes zoster; IR, incidence rate.

**Supplementary Table 3** List of opportunistic infections excluding TB

---

|                                                                                   | All tofacitinib, n |
|-----------------------------------------------------------------------------------|--------------------|
| Patients, n                                                                       | (N=61)*            |
| <hr/>                                                                             |                    |
| HZ (multidermatomal HZ [non-adjacent or >2 adjacent dermatomes] and disseminated) | 29                 |
| Oesophageal candidiasis                                                           | 12                 |
| Cytomegalovirus                                                                   | 7                  |
| Pneumocystosis                                                                    | 5                  |
| Cryptococcosis                                                                    | 5                  |
| Non-TB mycobacteria                                                               | 2                  |
| Nocardiosis                                                                       | 1                  |
| BK encephalitis                                                                   | 1                  |

---

\*One patient experienced two events of oesophageal candidiasis.

BK, BK virus; HZ, herpes zoster; TB, tuberculosis.

**Supplementary Table 4** TB cases in tofacitinib-treated patients (all doses) according to geographical background rates (WHO categorisation [20]).

| Geographical region                                 | Patients, n/N (%) | IR, patients with event/100 patient-years (95% CI) |
|-----------------------------------------------------|-------------------|----------------------------------------------------|
| High (>50 per 100,000 populations per year)         | 28/1,360 (2.1)    | 0.6 (0.4–0.9)                                      |
| Intermediate (10–≤ 50 per 100,000 populations/year) | 7/2,281 (0.3)     | 0.1 (0.04–0.2)                                     |
| Low (<10 per 100,000 populations/year)              | 1/2,553 (0.04)    | 0.01 (0.0–0.07)                                    |

CI, confidence interval; IR, incidence rate; TB, tuberculosis; WHO, World Health Organization.

**Supplementary Table 5** Geographical distribution of NMSC

| Geographic region/country, n (%) | All tofacitinib doses<br>(N=118) |
|----------------------------------|----------------------------------|
| Asia                             | 28 (23.7)                        |
| Australia                        | 27 (22.9)                        |
| Japan                            | 1 (0.8)                          |
| Europe                           | 19 (16.1)                        |
| Austria                          | 1 (0.8)                          |
| Bulgaria                         | 1 (0.8)                          |
| Czech Republic                   | 3 (2.5)                          |
| Denmark                          | 1 (0.8)                          |
| Germany                          | 5 (4.2)                          |
| Poland                           | 4 (3.4)                          |
| Slovakia                         | 1 (0.8)                          |

|               |           |
|---------------|-----------|
| Spain         | 3 (2.5)   |
| <hr/>         |           |
| Latin America | 6 (5.1)   |
| Brazil        | 3 (2.5)   |
| Chile         | 1 (0.8)   |
| Colombia      | 2 (1.7)   |
| <hr/>         |           |
| North America | 65 (55.1) |
| Canada        | 4 (3.4)   |
| United States | 61 (51.7) |

---

NMSC, non-melanoma skin cancer.

**Supplementary Figure 1** Cumulative hazard function to assess the hazard for developing a malignancy (excluding NMSC) over time.

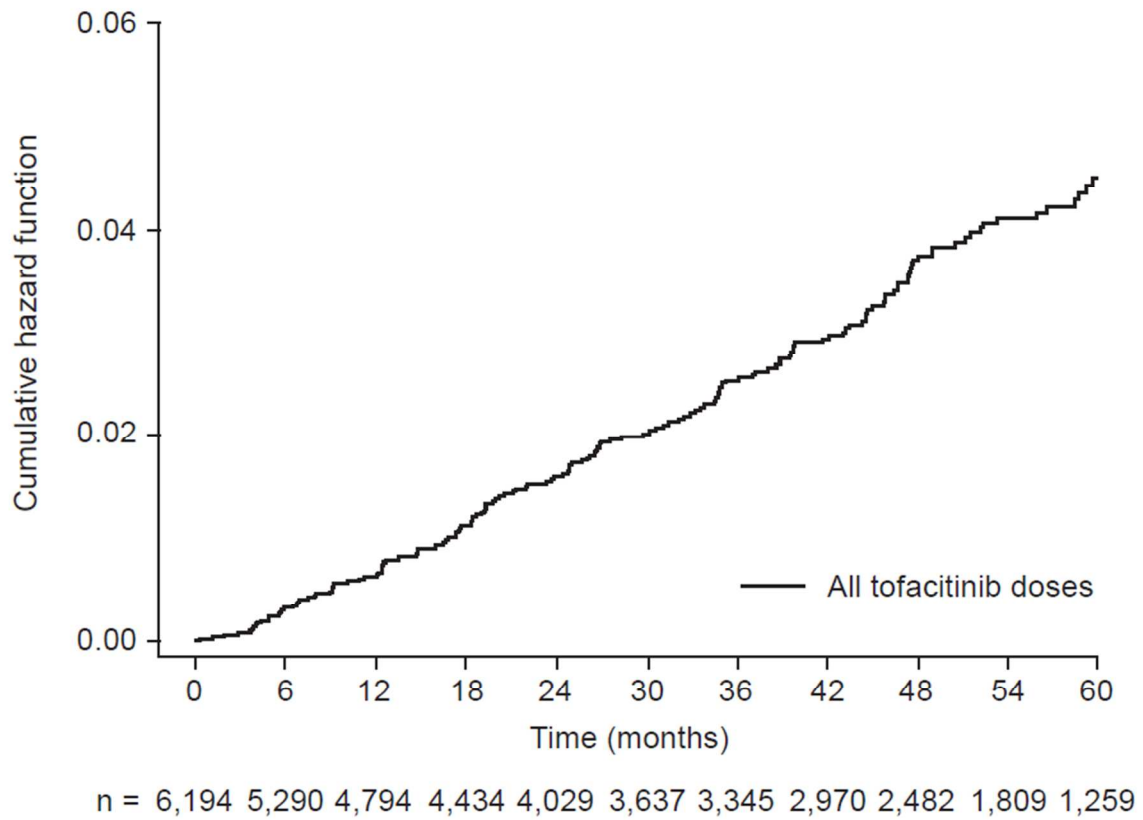

NMSC, non-melanoma skin cancer.

**Supplementary Figure 2** IRs of MACE over time\* for all tofacitinib doses.

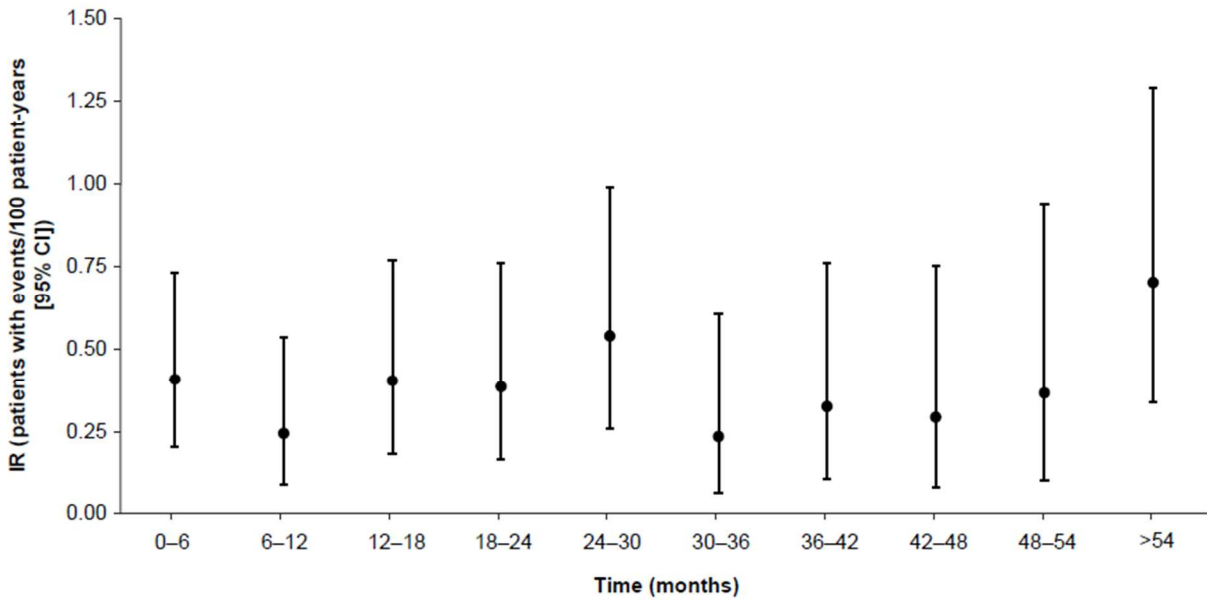

|                                                     | 0-6              | 6-12             | 12-18            | 18-24            | 24-30            | 30-36            | 36-42            | 42-48            | 48-54            | >54              |
|-----------------------------------------------------|------------------|------------------|------------------|------------------|------------------|------------------|------------------|------------------|------------------|------------------|
| Total patient exposure, n                           | 5,756            | 5,186            | 4,756            | 4,352            | 4,051            | 3,597            | 3,329            | 2,949            | 2,569            | 1,924            |
| Patients with MACE, n                               | 11               | 6                | 9                | 8                | 10               | 4                | 5                | 4                | 4                | 10               |
| Total patient-year exposure for event               | 2,694.3          | 2,446.1          | 2,228.5          | 2,073.4          | 1,855.0          | 1,696.8          | 1,533.8          | 1,358.3          | 1,089.0          | 1,425.0          |
| IR, patients with events/100 patient-years (95% CI) | 0.4<br>(0.2-0.7) | 0.2<br>(0.1-0.5) | 0.4<br>(0.2-0.8) | 0.4<br>(0.2-0.8) | 0.5<br>(0.3-1.0) | 0.2<br>(0.1-0.6) | 0.3<br>(0.1-0.8) | 0.3<br>(0.1-0.8) | 0.4<br>(0.1-0.9) | 0.7<br>(0.3-1.3) |

\*Exposure appears lower than for other adverse events, since the cardiovascular adjudication process only applied to data after February 25, 2009.

CI, confidence interval; IR, incidence rate; MACE, major adverse cardiovascular event.
